# Supplementary material for: Starting geometry creation and design method for freeform optics
Source: PubMed Central journal article supplement (PMC5931519; doi:10.1038/s41467-018-04186-9), 2018-05-01
Supplement: 41467_2018_4186_MOESM2_ESM.pdf [file 41467_2018_4186_MOESM2_ESM.pdf]

## **Description of Additional Supplementary Files**

Supplementary Movie 1: Each step of the design process is animated, showing the limiting aberration fields and how they change as a result of adding specific freeform surfaces to the system, which is also animated.
